# Supplementary material
Source: PubMed Central journal article supplement (PMC1450198)

**A**

TAP-PumHD

wild-type (*yw*)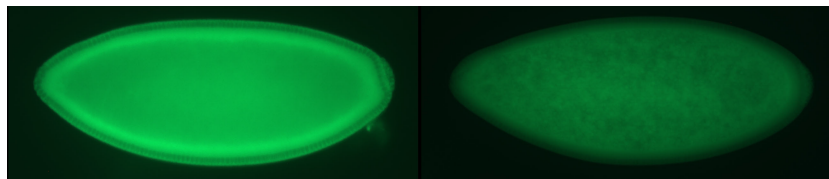**B**

adult flies

embryos

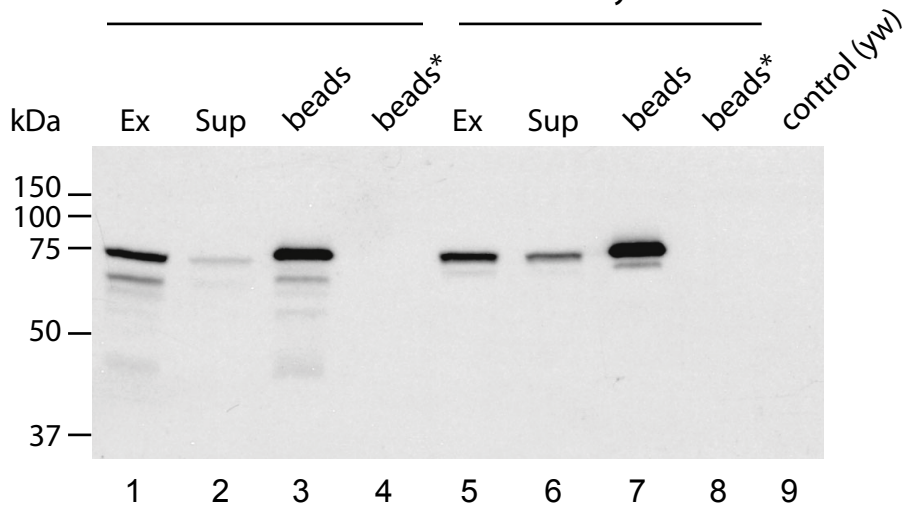

Supplement: pnas_0509260103_1.pdf [file pnas_0509260103_1.pdf]

## All genes

adult

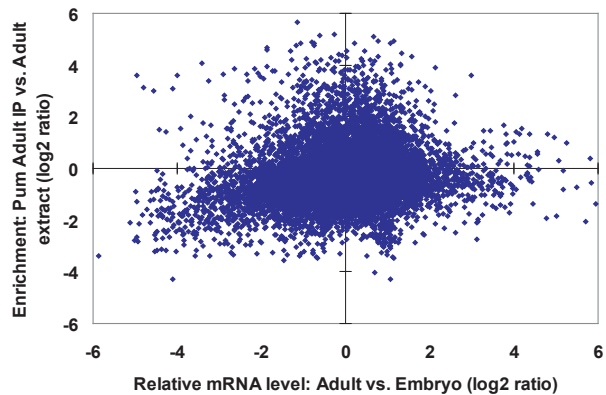

## Pum targets

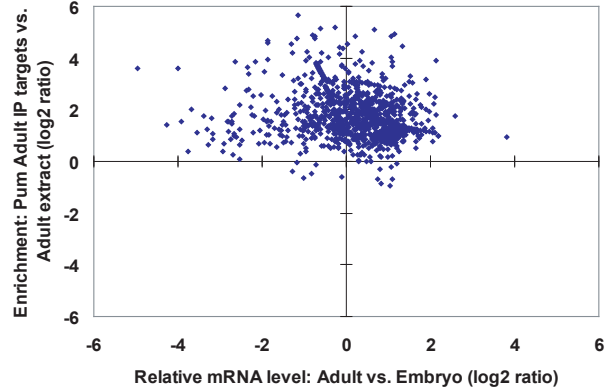

embryo

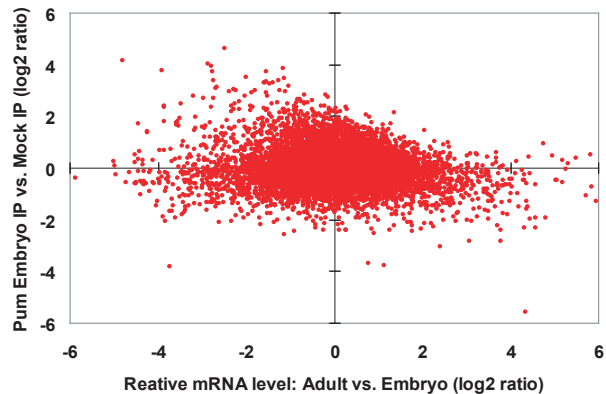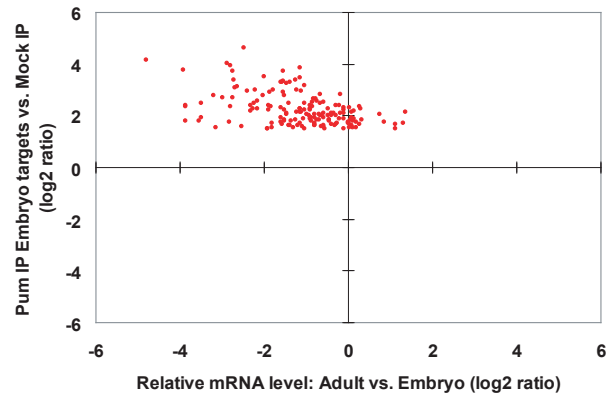

Supplement: pnas_0509260103_2.pdf [file pnas_0509260103_2.pdf]

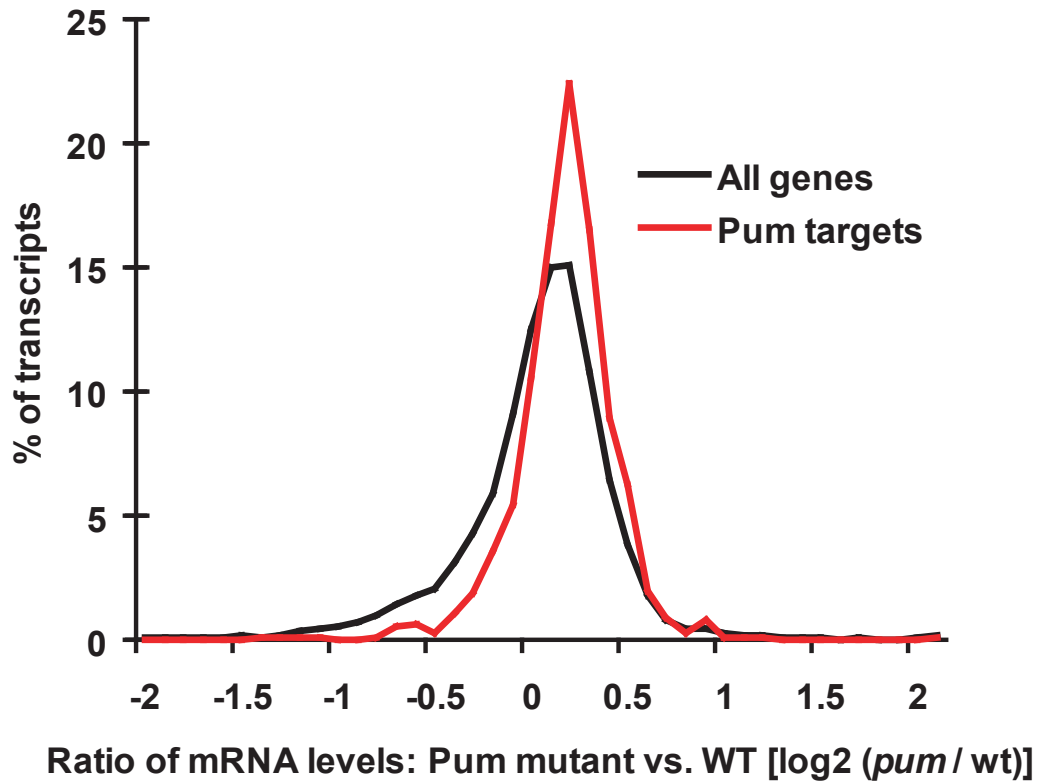

Supplement: pnas_0509260103_3.pdf [file pnas_0509260103_3.pdf]
